# Supplementary material for: Heterogeneous CD8+ T Cell Migration in the Lymph Node in the Absence of Inflammation Revealed by Quantitative Migration Analysis
Source: PubMed Central journal article supplement (PMC4334969; doi:10.1371/journal.pcbi.1004058), 2015-02-18

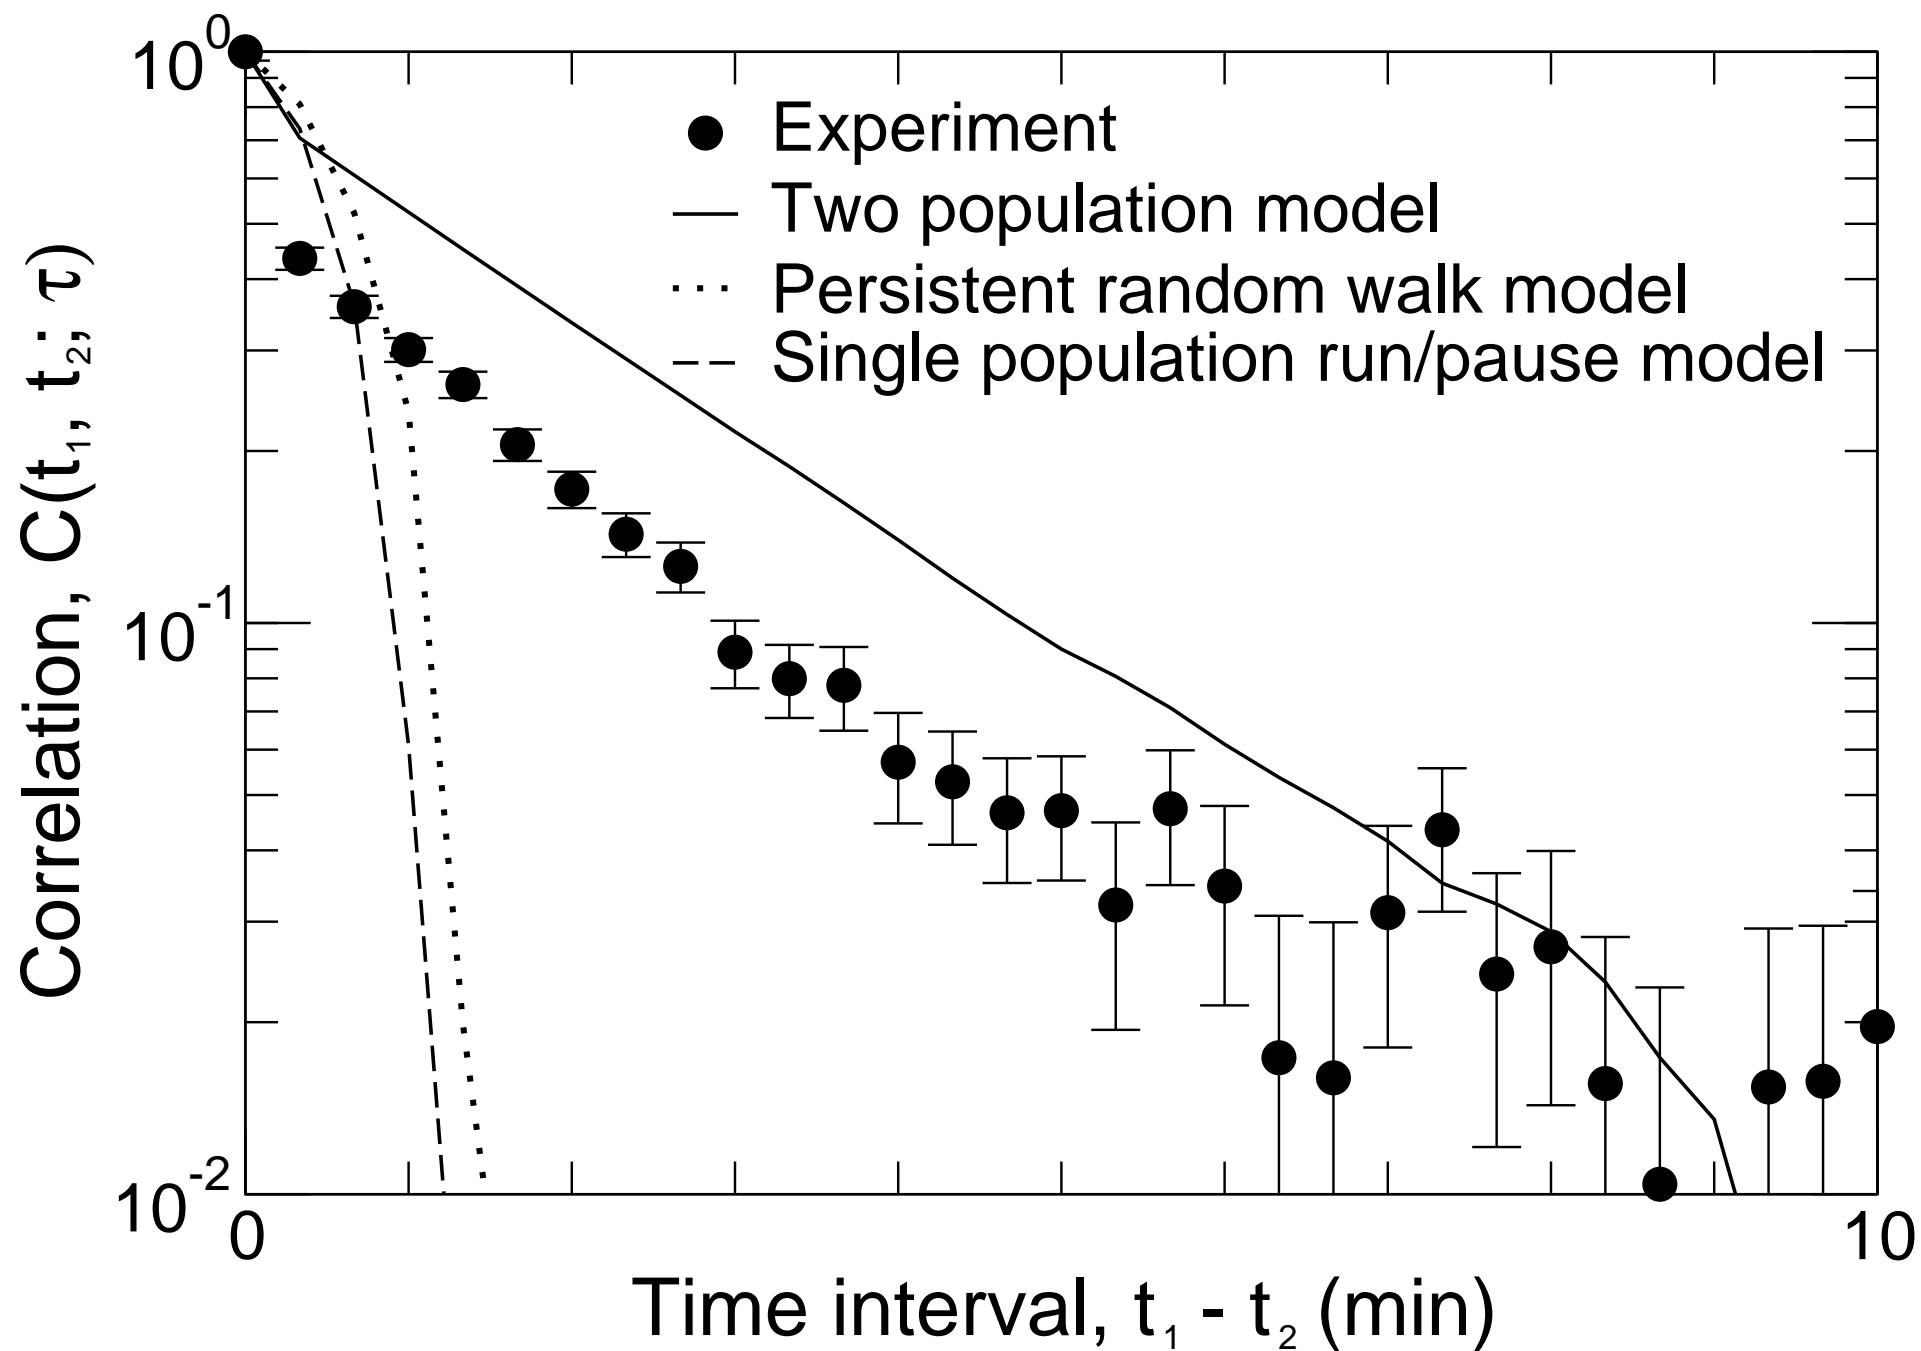

Supplement: pcbi.1004058.s001.pdf [file pcbi.1004058.s001.pdf]
